# Supplementary material for: Enhanced electrochemical activity of perforated graphene in nickel-oxide-based supercapacitors and fabrication of potential asymmetric supercapacitors
Source: Royal Society of Chemistry journal article supplement (doi:10.1039/c6se00085a), 2017-01-01
Supplement: c6se00085a1.pdf [file c6se00085a1.pdf]

## Supporting Information

### Enhanced electrochemical activity of perforated graphene in nickel-oxide-based supercapacitors and fabrication of potential asymmetric supercapacitors

Qi Xun Xia,<sup>a</sup> Je Moon Yun,<sup>b\*</sup> Rajaram S. Mane,<sup>b</sup> Lei Li,<sup>a</sup> Jianjian Fu,<sup>a</sup> Jae Hong Lim,<sup>c</sup> and Kwang Ho Kim<sup>\*,a, b</sup>

<sup>a</sup>School of Materials Science and Engineering, Pusan National University, San 30 Jangjeon-dong, Geumjeong-gu, Busan 609-735, Republic of Korea

<sup>b</sup>Global Frontier R&D Center for Hybrid Interface Materials, Pusan National University, San 30 Jangjeon-dong, Geumjeong-gu, Busan 609-735, Republic of Korea

<sup>c</sup>Materials Processing Division, Korea Institute of Materials Science (KIMS), Changwon 642-831, Republic of Korea

\*Email: [\\* kwhokim@pusan.ac.kr](mailto:kwhokim@pusan.ac.kr) (K. H. Kim, Prof.)

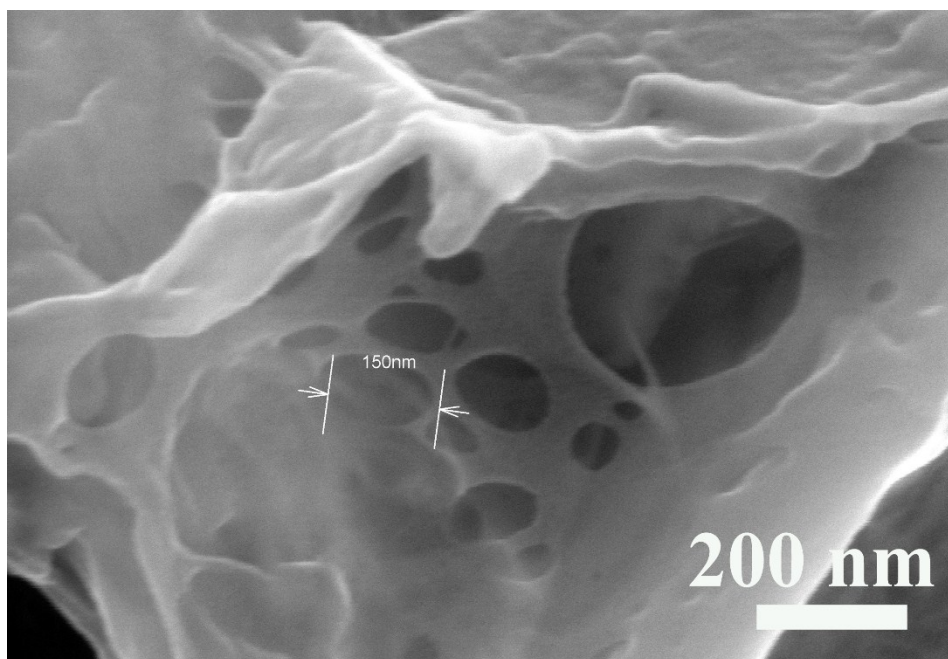

**Figure S1.** FESEM images of perforated graphene oxide.

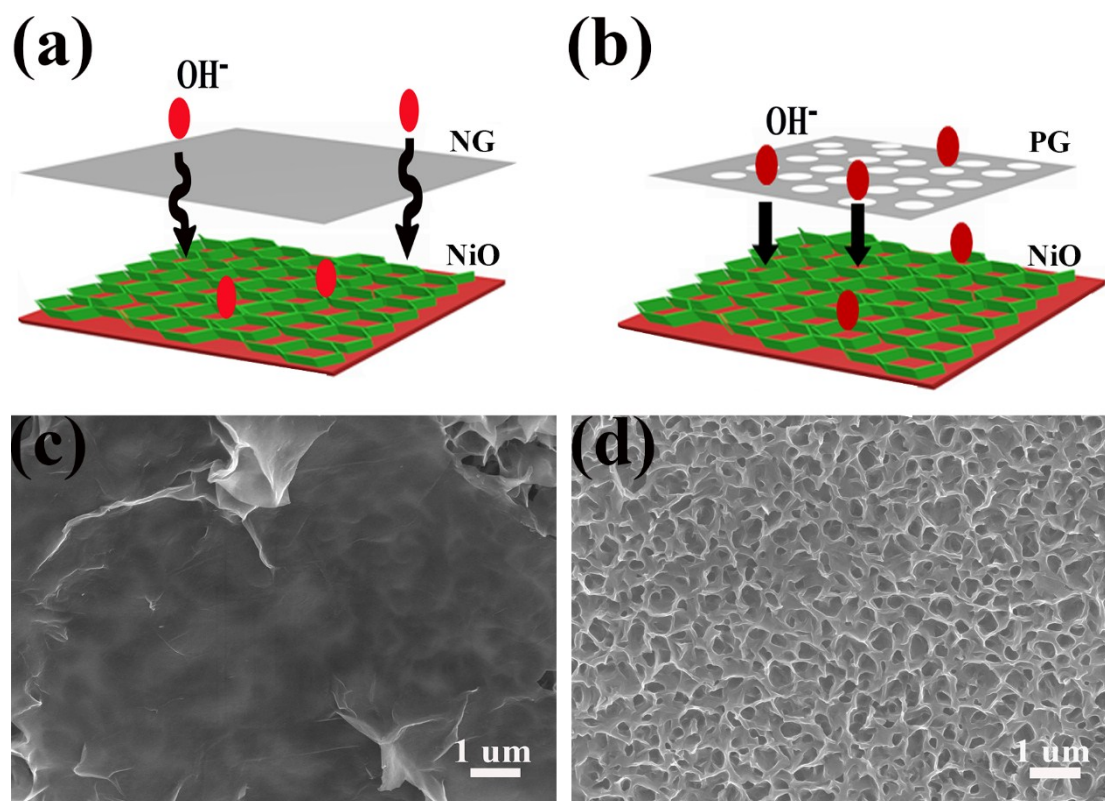

**Figure S2.** (a, b) Schemes of the formation of NiO/NG and NiO/PG, and (c, d) their respective FESEM images.

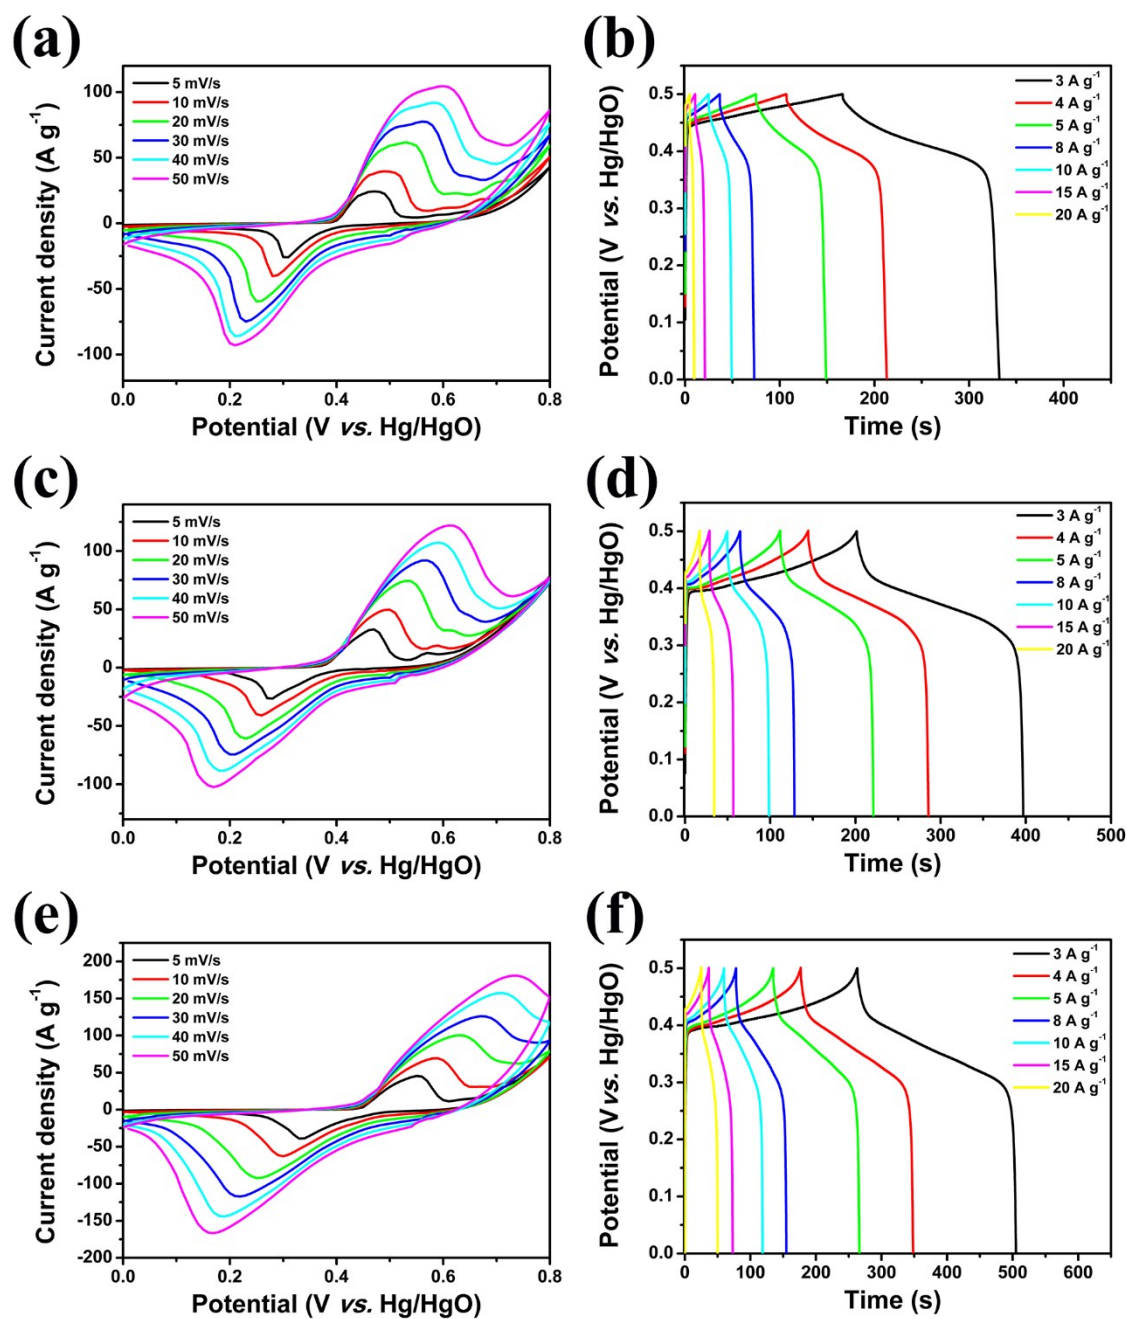

**Figure S3.** CV curves and galvanostatic charge-discharge measurements of (a, b) NiO, (c, d) NiO/NG, and (e, f) NiO/PG electrodes.

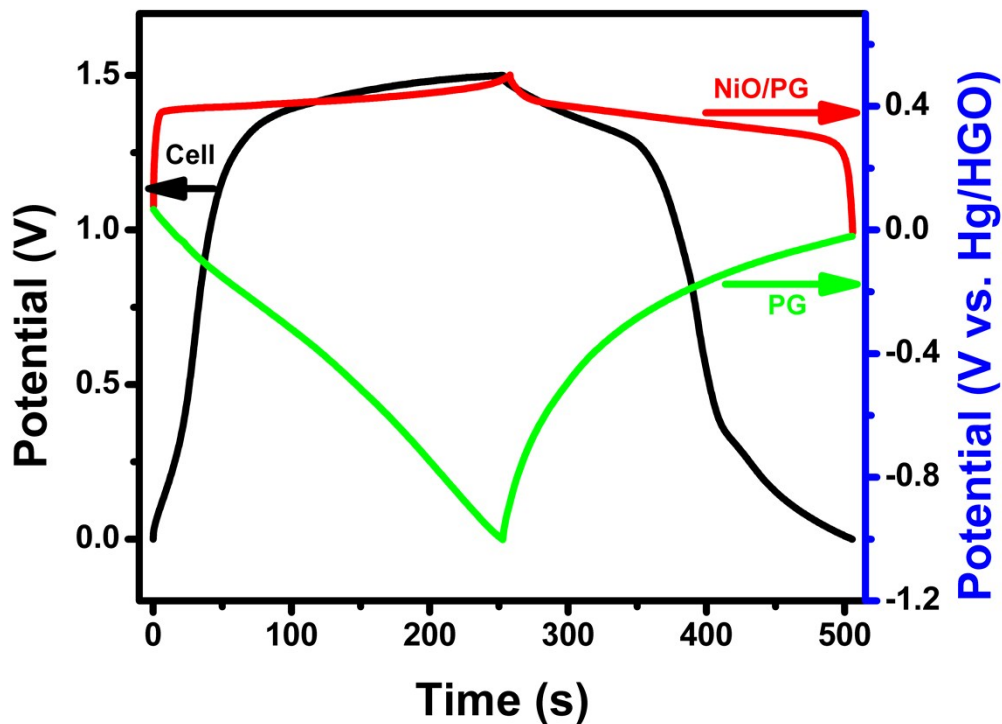

**Figure S4.** Galvanostatic charge-discharge curves of the asymmetric cell and the in situ tracked variation of the potential in each individual electrode.

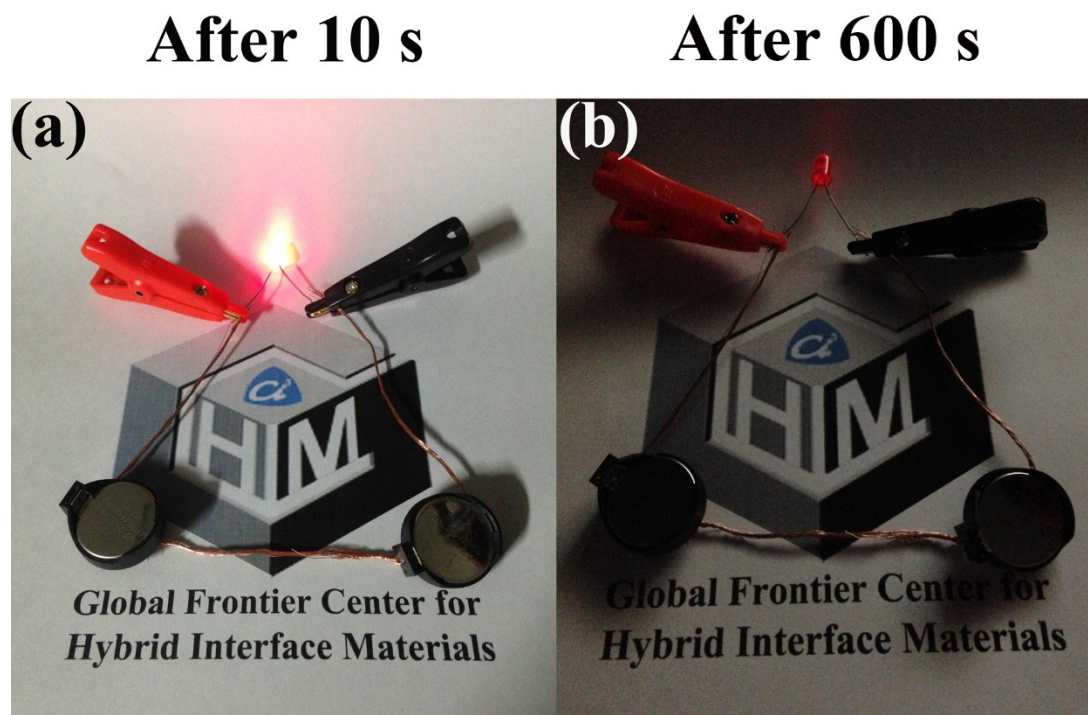

**Figure S5.** Digital photographs presenting the red LED powered by two ASCs connected in series (a) after 10 s, and (b) after 600 s.

**Table S1.** EIS fitting parameters of PG electrode.

| $R_s$ ( $\Omega$ ) | $R_{ct}$ ( $\Omega$ ) | CPE (F) | $Z_w$ ( $\Omega$ s <sup>-1/2</sup> ) | $C_{ps}$ (F) |
|--------------------|-----------------------|---------|--------------------------------------|--------------|
| 1.86               | 3.36                  | 0.03    | 0.22                                 | 11.09        |
